# Supplementary material
Source: ML conference proceedings conference paper supplement (https://openaccess.thecvf.com/content/ICCV2025/html/Stoica_Contrastive_Flow_Matching_ICCV_2025_paper.html)
Supplement: Supplementary file 1 [file Stoica_Contrastive_Flow_Matching_ICCV_2025_supplemental.pdf]

## A. Text-to-Image Qualitative Results

We visualize generations between our REPA-MMDiT models described in Section 5.3 trained with flow matching (FM) loss and with  $\Delta$ FM on CC3M with a batch size of 256 for 400K iterations in Figure 6. We plot images in pairs, with FM images on the left and  $\Delta$ FM images on the right, and show the respective caption for each pair above. All images are generated without classifier-free guidance and using NFE=50, and are the same images used in Table 3.

## B. Deriving Contrastive-Flow Matching Interference

### B.1. Closed-form solution to Eq. 4

We first re-introduce Eq. 4 for convenience,

$$\mathcal{L}^{(\Delta\text{FM})}(\theta) = \mathbb{E} \left[ \begin{aligned} & \|v_\theta(x_t, t, y) - (\dot{\alpha}_t \hat{x} + \dot{\sigma}_t \epsilon)\|^2 \\ & - \lambda \|v_\theta(x_t, t, y) - (\dot{\alpha}_t \tilde{x} + \dot{\sigma}_t \tilde{\epsilon})\|^2 \end{aligned} \right]$$

Minimizing the expectation, expanding all norms and letting  $v(\theta) = v(x_t, t, y)$ , we can simplify the expectation to:

$$= \min_{\theta} \mathbb{E} \left[ \begin{aligned} & (1 - \lambda) v(\theta)^T v(\theta) \\ & - 2v(\theta)^T [(\dot{\alpha}_t \hat{x} + \dot{\sigma}_t \epsilon) - \lambda(\dot{\alpha}_t \tilde{x} + \dot{\sigma}_t \tilde{\epsilon})] \\ & + (\dot{\alpha}_t \hat{x} + \dot{\sigma}_t \epsilon)^T (\dot{\alpha}_t \hat{x} + \dot{\sigma}_t \epsilon) \\ & - \lambda (\dot{\alpha}_t \tilde{x} + \dot{\sigma}_t \tilde{\epsilon})^T (\dot{\alpha}_t \tilde{x} + \dot{\sigma}_t \tilde{\epsilon}) \end{aligned} \right] \quad (7)$$

$$= \min_{\theta} \mathbb{E} \left[ \begin{aligned} & (1 - \lambda) v(\theta)^T v(\theta) \\ & - 2v(\theta)^T [(\dot{\alpha}_t \hat{x} + \dot{\sigma}_t \epsilon) - \lambda(\dot{\alpha}_t \tilde{x} + \dot{\sigma}_t \tilde{\epsilon})] \end{aligned} \right] \quad (8)$$

$$\propto \min_{\theta} \mathbb{E} \left[ \left\| \frac{\sqrt{1 - \lambda} v(\theta)}{(\dot{\alpha}_t \hat{x} + \dot{\sigma}_t \epsilon) - \lambda(\dot{\alpha}_t \tilde{x} + \dot{\sigma}_t \tilde{\epsilon})} \right\|_2^2 \right] \quad (9)$$

Setting the gradient with respect to  $v(\theta)$  to 0,

$$\sqrt{1 - \lambda} v(\theta)^* = \mathbb{E} \left[ \frac{(\dot{\alpha}_t \hat{x} + \dot{\sigma}_t \epsilon) - \lambda(\dot{\alpha}_t \tilde{x} + \dot{\sigma}_t \tilde{\epsilon})}{\sqrt{1 - \lambda}} \right] \quad (10)$$

$$v(\theta)^* = \frac{\mathbb{E} [\dot{\alpha}_t \hat{x} + \dot{\sigma}_t \epsilon] - \lambda \mathbb{E} [\dot{\alpha}_t \tilde{x} + \dot{\sigma}_t \tilde{\epsilon}]}{1 - \lambda} \quad (11)$$

Finally, observe that  $\mathbb{E} [\dot{\alpha}_t \hat{x} + \dot{\sigma}_t \epsilon]$  is the solution to the flow matching objective. Setting  $\mathbb{E} [\dot{\alpha}_t \tilde{x} + \dot{\sigma}_t \tilde{\epsilon}] = \hat{T}$  and observing that  $x_t$  does not depend on  $\hat{x}$  or  $\tilde{\epsilon}$  we obtain:

$$\min_{\theta} \mathcal{L}^{(\Delta\text{FM})}(\theta) = \frac{\min_{\theta} \mathcal{L}^{(\text{FM})}(\theta) - \lambda \hat{T}}{1 - \lambda} \quad (12)$$

### B.2. Coupling with CFG

Classifier-free guidance (CFG) is originally defined over the flow matching solution of  $\min_{\theta} \mathcal{L}^{(\text{FM})}$ . Re-writing Eq. 12

| Model               | Batch Size | Metrics      |               |             |
|---------------------|------------|--------------|---------------|-------------|
|                     |            | FID ↓        | IS ↑          | sFID ↓      |
| REPA SiT-B/2        | 256        | 27.33        | 61.60         | 11.70       |
| + Using $\Delta$ FM | 256        | <b>20.52</b> | <b>69.71</b>  | <b>5.47</b> |
| REPA SiT-B/2        | 512        | 24.45        | 69.15         | 11.42       |
| + Using $\Delta$ FM | 512        | <b>17.06</b> | <b>81.41</b>  | <b>5.29</b> |
| REPA SiT-B/2        | 1024       | 22.00        | 76.15         | 11.76       |
| + Using $\Delta$ FM | 1024       | <b>15.23</b> | <b>88.53</b>  | <b>5.20</b> |
| REPA SiT-XL/2       | 256        | 11.14        | 115.83        | 8.25        |
| + Using $\Delta$ FM | 256        | <b>7.29</b>  | <b>129.89</b> | <b>4.93</b> |
| REPA SiT-XL/2       | 512        | 10.15        | 129.43        | 9.00        |
| + Using $\Delta$ FM | 512        | <b>6.36</b>  | <b>146.17</b> | <b>5.42</b> |

Table 6.  **$\Delta$ FM Scales with Batch Size.** We train all models for 400K iterations and strictly follow the protocol of [44]. All metrics are measured with the SDE Euler-Maruyama sampler with NFE=50 and without classifier guidance. We use  $\lambda = 0.05$  for all models trained with  $\Delta$ FM and do not change any other hyperparameters.  $\uparrow$  indicates that higher values are better, with  $\downarrow$  denoting the opposite. Improvement using  $\Delta$ FM evenly scales with batch-size, and even outperforms flow-matching models with *half* the batch-size.

and substituting it into the CFG equation, we obtain:

$$CFG = w v^{(\text{FM})}(x_t, t, y) + (1 - w) v^{(\text{FM})}(x_t, t, \emptyset) \quad (13)$$

$$= \begin{bmatrix} w \left[ (1 - \lambda) v^{(\Delta\text{FM})}(x_t, t, y) + \lambda \hat{T} \right] \\ - (1 - w) \left[ (1 - \lambda) v^{(\Delta\text{FM})}(x_t, t, \emptyset) + \lambda \hat{T} \right] \end{bmatrix} \quad (14)$$

$$= \begin{bmatrix} (1 - \lambda) \left[ w v^{(\Delta\text{FM})}(x_t, t, y) + (1 - w) v^{(\Delta\text{FM})}(x_t, t, \emptyset) \right] + \lambda \hat{T} \end{bmatrix} \quad (15)$$

Letting  $v(x_t|y) = v^{(\Delta\text{FM})}(x_t, t, y)$  and  $v(x_t|\emptyset) = v^{(\Delta\text{FM})}(x_t, t, \emptyset)$ , we obtain the Eq. from Section 5.4:  $CFG = (1 - \lambda) [w v(x_t|y) + (1 - w) v(x_t|\emptyset)] + \lambda \hat{T}$ .

### B.3. Other CFG Couplings

While we find that our proposed coupling strategy for  $\Delta$ FM and CFG works well for our setting, other suitable variations may also exist. For instance, one may instead reduce conflicts by following the equation:  $CFG = (w + \lambda) v(x_t|y) - (1 - w) v(x_t|\emptyset) - \lambda \hat{T}$ , where  $\lambda$ , and  $w$  are free hyperparameters. We leave such exploration to future work.

## C. Effects of batch size on $\Delta$ FM.

In Table 6, we study the effects of batch size on our loss. It is well known that batch size has an important effect on contrastive style losses [5, 7, 15] that draw negatives within the batch. This can be understood as a sample diversity issue. If the batch size is larger than negative samples within the batch are more representative of the true distribution. In this table, we see a similar trend: larger batch sizes are important

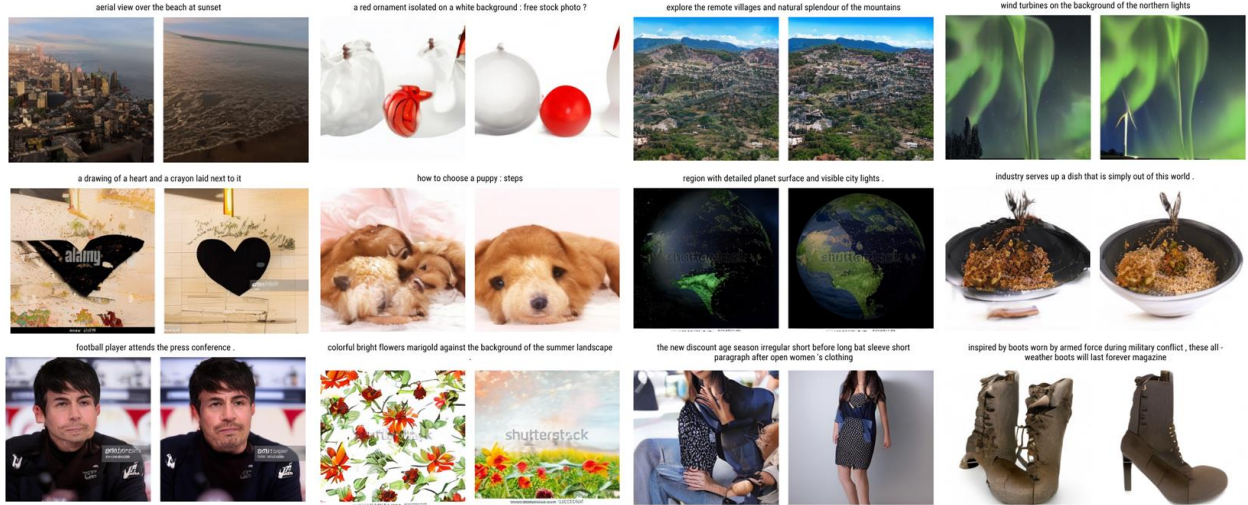

Figure 6. **CC3M side-by-side generations between a REPA-MMDiT model trained with flow matching (left) and  $\Delta$ FM (right).** Models are trained for 400K iterations using a batch-size of 256 and images are generated without classifier-free guidance and using NFE=50.

for maximizing the performance of  $\Delta$ FM across several model scales. We also maintain our improvements over the REPA baseline through all batch sizes and model scales.
